# Supplementary material for: Controllable growth of organic nanostructures from 0D to 1D with different optical properties
Source: Royal Society of Chemistry journal article supplement (doi:10.1039/c5ra17516j), 2015-01-01

## Supporting Information

### Controllable growth of organic nanostructures from 0D to 1D with different optical properties

Yusen Luo, Zheng Xue, Yongjun Li, Huibiao Liu, Wensheng Yang and Yuliang Li

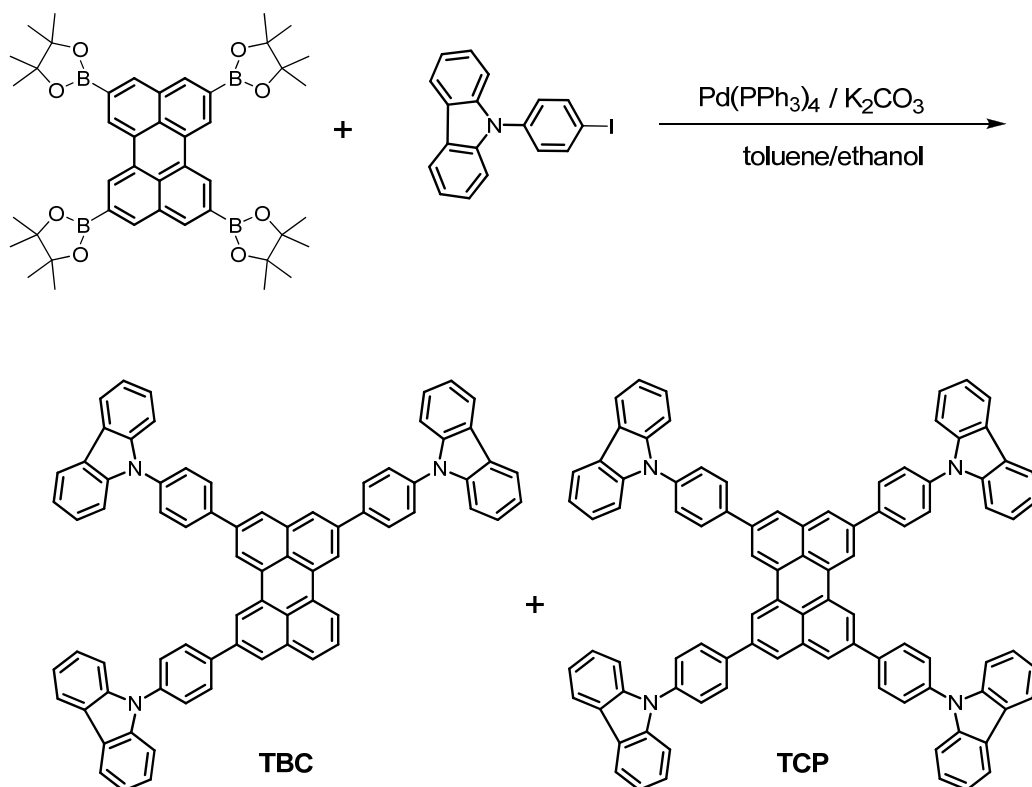

**Scheme S1.** Synthetic route of the target compounds **TBC** and **TCP**.

#### Materials

All chemical reagents were purchased from Alfa Aesar or Aldrich Chemicals and used without further purification. Column chromatography was performed on silica gel (size 200–300 mesh).

2,5,8,11-tetrakis(4,4,5,5-tetramethyl-1,3,2-dioxaborolan-2-yl)perylene (**1**)<sup>1</sup> and 9-(4-iodophenyl)-9H-carbazole (**2**)<sup>2</sup> were prepared according to the literature methods.

**2,5,8,11-tetrakis(4-(9H-carbazol-9-yl)phenyl)perylene (TCP).** To a solution of **1** (100 mg, 0.13 mmol) in toluene/ethanol (54 mL/ 18 mL) was added **2** (280 mg, 0.76 mmol), the resulting solution was stirred under N<sub>2</sub> at room temperature for 30 min. Subsequently, Pd(PPh<sub>3</sub>)<sub>4</sub> (36 mg, 0.03 mmol) and K<sub>2</sub>CO<sub>3</sub> (200mg, 1.45 mmol, dissolved in distilled water) were added and the

reaction vessel was placed in an oil bath at 70°C for 48 h. After that, the solvent was evaporated in vacuo and the crude product was purified by column chromatography silica gel with CH<sub>2</sub>Cl<sub>2</sub>/petroleum ether (1:2) to afford **TCP** as yellow solids (87 mg, 54%). IR (v, cm<sup>-1</sup>) 1601.1, 1516.5, 1478.9, 1448.6, 1355.2, 1334.2, 1313.8, 1226.0, 1169.3, 831.7, 746.1, 720.6. <sup>1</sup>H NMR (500 MHz, CDCl<sub>2</sub>CDCl<sub>2</sub>) δ 8.78 (s, 1H), 8.74 (s, 2H), 8.66 (s, 1H), 8.55 (d, *J* = 7.9 Hz, 1H), 8.31 (s, 1H), 8.24 – 8.14 (m, 8H), 8.14 – 7.98 (m, 8H), 7.93 (s, 1H), 7.91 (s, 1H), 7.84 – 7.69 (m, 8H), 7.57 (ddd, *J* = 28.3, 20.1, 8.1 Hz, 8H), 7.45 (ddd, *J* = 20.2, 13.5, 7.4 Hz, 8H), 7.37 – 7.24 (m, 8H). Due to its poor solubility, the <sup>13</sup>C NMR is not available. Hires-MS (MALDI-TOF): calcd for C<sub>92</sub>H<sub>56</sub>N<sub>4</sub>: 1216.4505; found: 1216.4524. Anal. Calcd for C<sub>92</sub>H<sub>56</sub>N<sub>4</sub>, C, 90.76; H, 4.64; N, 4.60; Found C, 90.79; H, 4.60; N, 4.58.

**9,9',9''-(perylene-2,5,8-triyltris(benzene-4,1-diyl))tris(9H-carbazole) (TBC)**. Compound **1** could easily loss one boric acid ester during the synthesis of compound **TCP**. Thus **TBC** was obtained as a by-product with 30 mg (yellow). IR (v, cm<sup>-1</sup>) 1602.2, 1518.2, 1479.2, 1449.8, 1336.6, 1315.3, 1228.4, 1170.8, 833.3, 747.7, 722.8. <sup>1</sup>H NMR (400 MHz, CDCl<sub>3</sub>) δ 8.70 (d, *J* = 6.1 Hz, 2H), 8.61 (s, 1H), 8.45 (d, *J* = 7.6 Hz, 1H), 8.19 (t, *J* = 7.1 Hz, 6H), 8.13 (s, 2H), 8.12 - 8.04 (m, 7H), 7.90 (d, *J* = 8.2 Hz, 1H), 7.78 (m, *J* = 8.2, 5.2 Hz, 6H), 7.65 (t, *J* = 7.8 Hz, 1H), 7.58 - 7.51 (m, 6H), 7.47 (m, *J* = 8.1 Hz, 6H), 7.34 (m, *J* = 7.4 Hz, 6H). Due to its poor solubility, the <sup>13</sup>C NMR is not available. MS (MALDI-TOF): calcd for C<sub>74</sub>H<sub>45</sub>N<sub>3</sub>: 975.3613; found: 975.36180. Anal. Calcd for C<sub>74</sub>H<sub>45</sub>N<sub>3</sub>, C, 91.05; H, 4.65; N, 4.30; Found C, 91.11; H, 4.61 N, 4.27.

### Characterization

<sup>1</sup>H NMR spectra were obtained at Bruker ARX400 spectrometer using tetramethylsilane (TMS) as the internal standard. High resolution mass spectrometric measurements were obtained on the Bruker Biflex III MALDI-TOF. SEM images were taken from Hitachi S-4800 microscopes at an accelerating voltage of 15 kV. TEM images were taken from a JEOL JEM-1011 microscope at an accelerating voltage of 100 kV. UV-Vis spectra were measured on a Hitachi U-3010 spectrometer. The fluorescence spectra were measured on a Hitachi F-4500 spectrometer. Fluorescence images of the microstructures were taken by using a laser-based fluorescence microscope (Olympus IX81) and an intensified charge-coupled device (CCD, Olympus DP71) detection system. Cyclic voltammograms (CVs) and differential pulse voltammetric curves (DPVs) were recorded on a

CHI660D electrochemical workstation using glassy carbon discs as the working electrode, Pt wire as the counter electrode and calomel electrode as the reference. 0.1 M Tetrabutylammonium hexafluorophosphate ( $\text{Bu}_4\text{NPF}_6$ ) dissolved in chromatographically pure  $\text{CH}_2\text{Cl}_2$  was employed as the supporting electrolyte.

#### References:

1. Y. Chen, G. Huang, C. Hsiao and S. Chen, *J. Am. Chem. Soc.*, 2006, **128**, 8549-8558.
2. D. Coventry, A. Batsanov, A. Goeta, J. Howard, T. Marder and R. Perutz, *Chem. Commun.*, 2005, 16, 2172-2174.

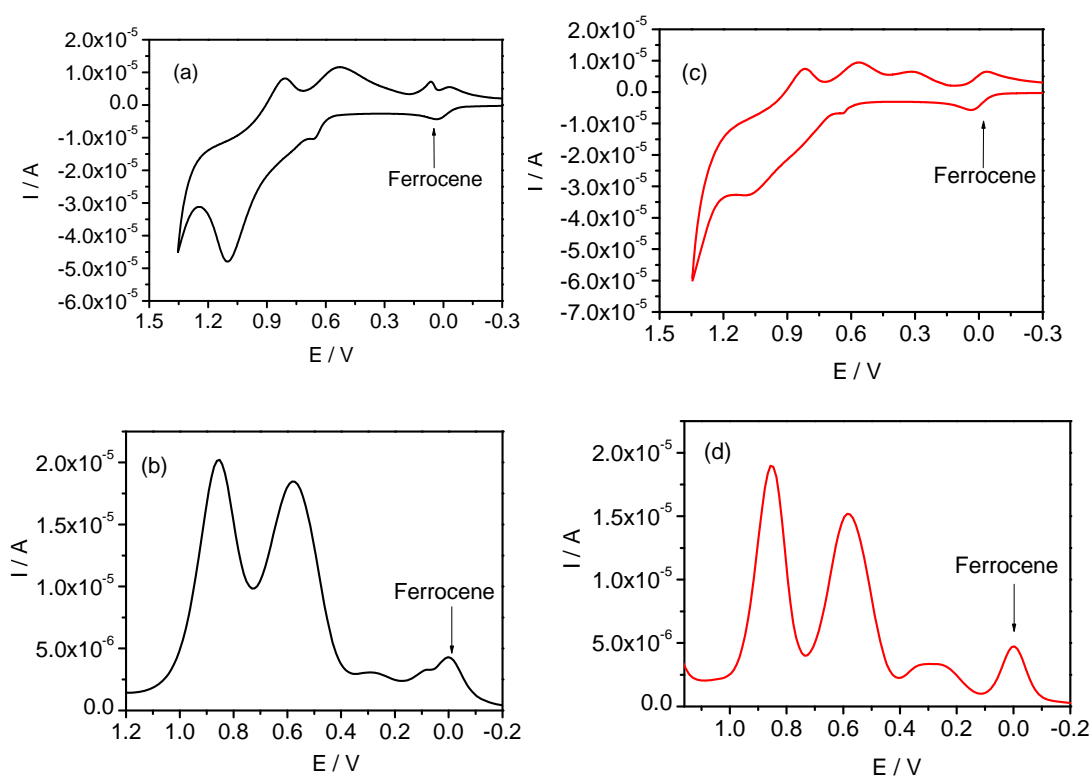

**Figure S1.** Cyclic voltammetry curves of TBC (a) and TCP (c) and differential pulse voltammetry curves of TBC (b) and TCP (d).

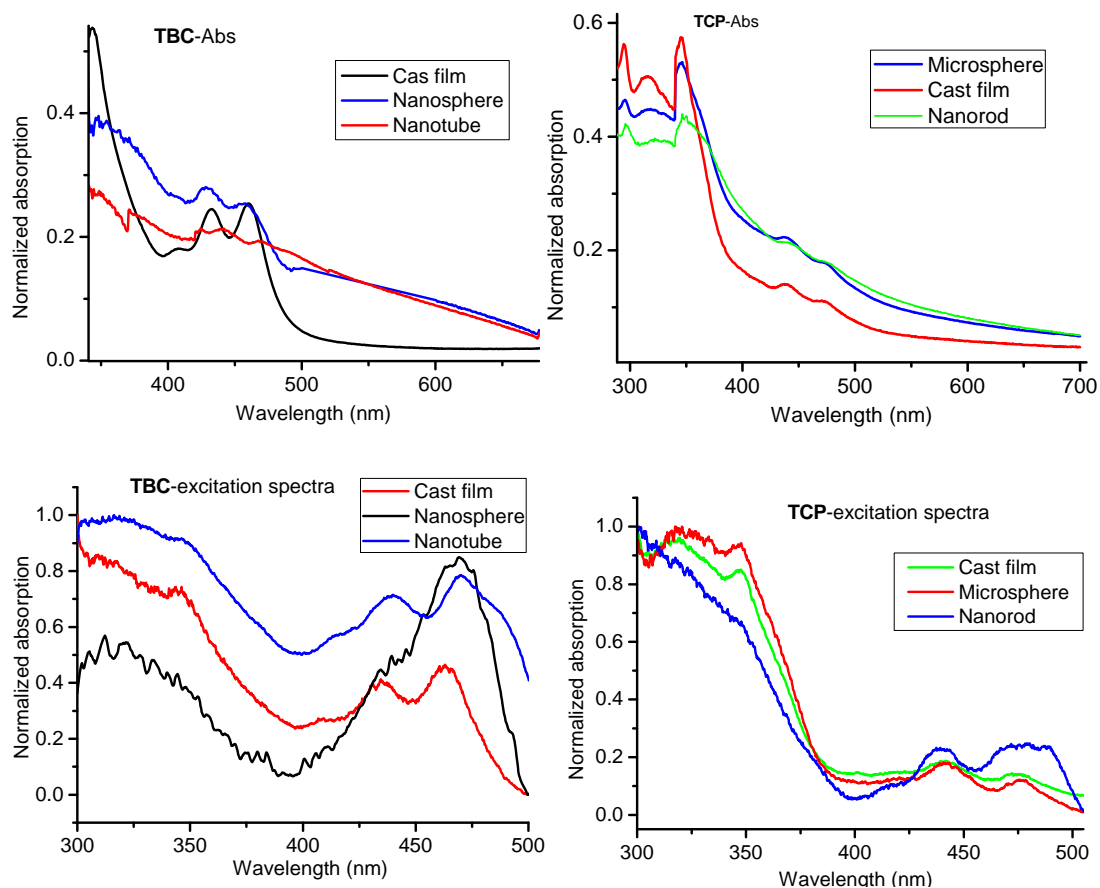

**Figure S2.** Normalized UV-Vis absorption and excitation spectra of the spin-casting film, nanosphere, nanotube/nanorod of **TBC** and **TCP**.

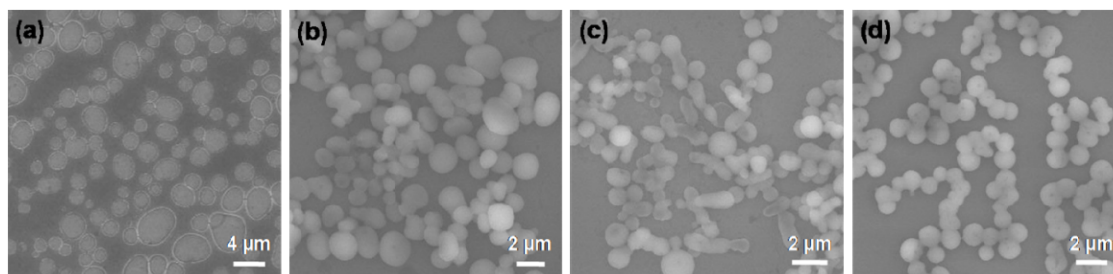

**Figure S3.** SEM images of **TBC** prepared in  $\text{CH}_2\text{Cl}_2$  / acetone with different volume ratio (v/v) by solvent vapor technique. (a) v/v = 40:0, (b) v/v = 40:3, (c) v/v = 40:10 and (d) v/v = 40:40.

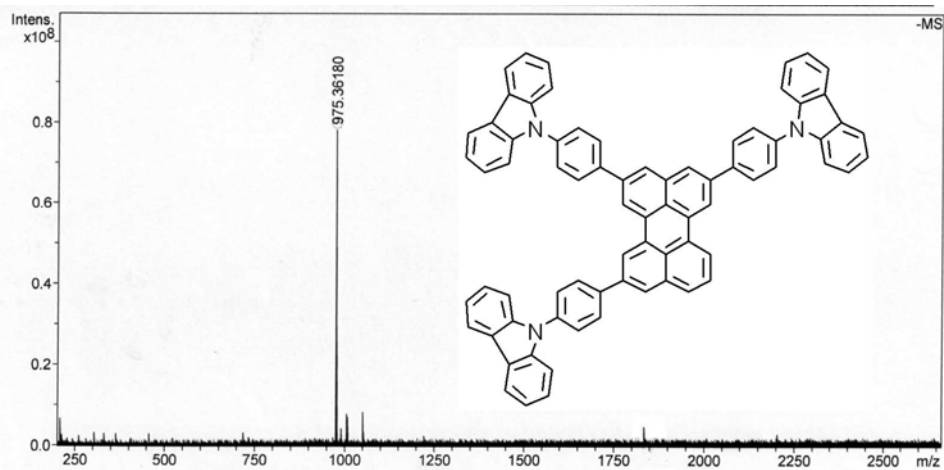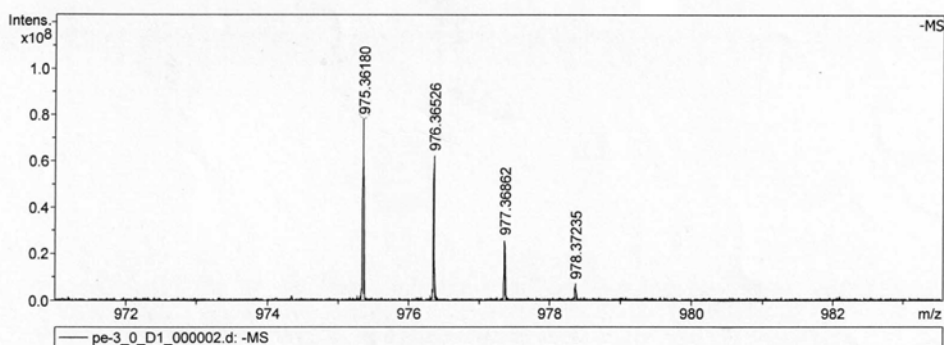

| Meas. m/z  | # | Ion Formula | Score  | m/z        | err [ppm] | Mean err [ppm] | mSigma | rdb  | e <sup>-</sup> Conf | N-Rule |
|------------|---|-------------|--------|------------|-----------|----------------|--------|------|---------------------|--------|
| 975.361800 | 1 | C74H45N3    | 100.00 | 975.361897 | 0.1       | -0.0           | 11.7   | 54.0 | odd                 | ok     |

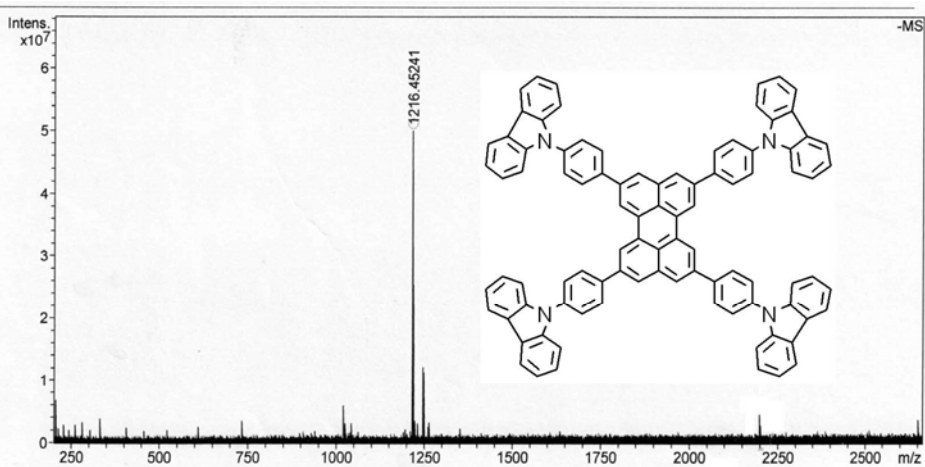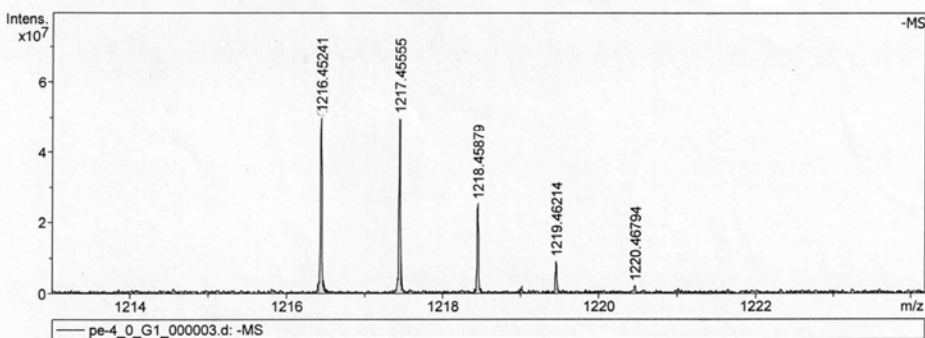

| Meas. m/z   | # | Ion Formula | Score  | m/z         | err [ppm] | Mean err [ppm] | mSigma | rdb  | e <sup>-</sup> Conf | N-Rule |
|-------------|---|-------------|--------|-------------|-----------|----------------|--------|------|---------------------|--------|
| 1216.452410 | 1 | C92H56N4    | 100.00 | 1216.451046 | 1.1       | -1.1           | 9.9    | 67.0 | odd                 | ok     |

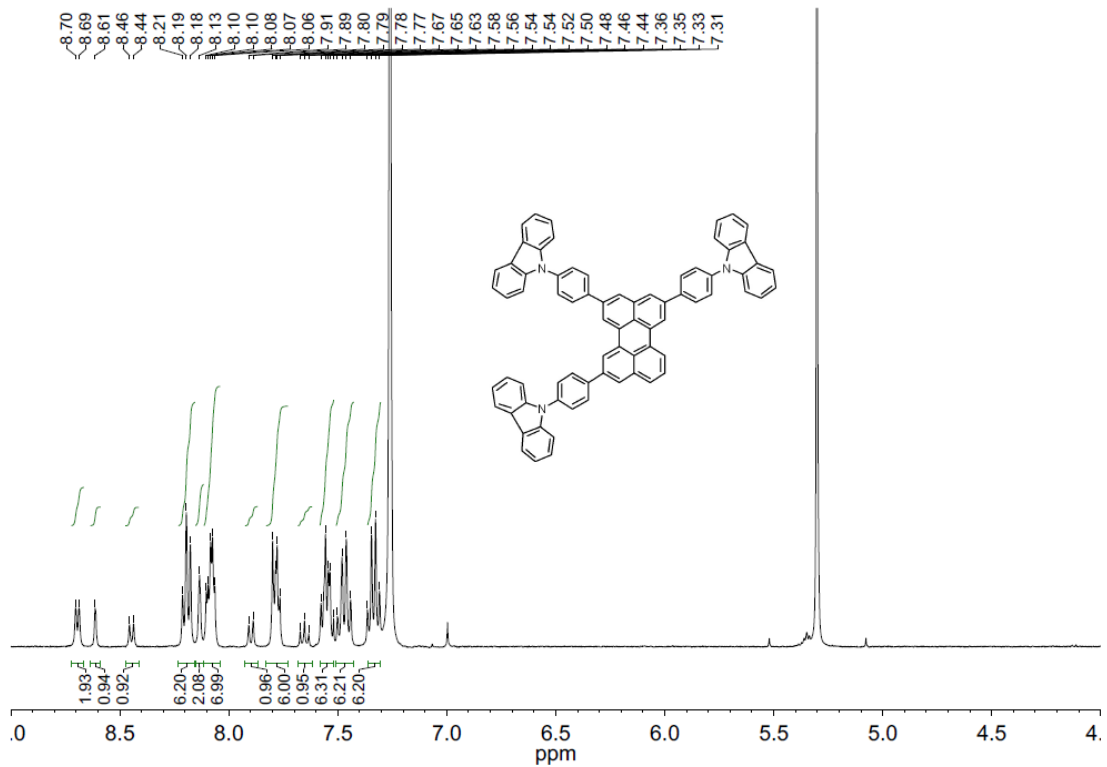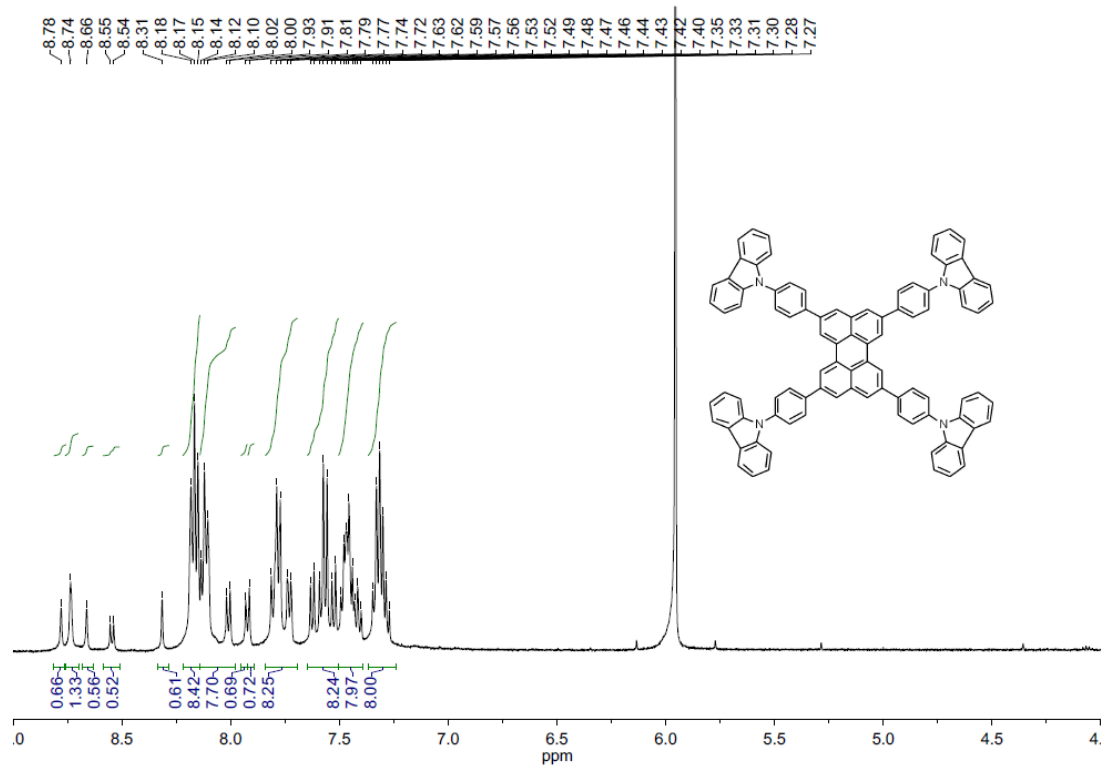

Supplement: c5ra17516j1.pdf [file c5ra17516j1.pdf]
